# Supplementary material for: Exploration of the Dynamic Properties of Protein Complexes Predicted from Spatially Constrained Protein-Protein Interaction Networks
Source: PLoS Comput Biol. 2014 May 29;10(5):e1003654. doi: 10.1371/journal.pcbi.1003654 (PMC4038459; doi:10.1371/journal.pcbi.1003654)
Supplement: Dataset S1 — PIN edges for the extended Arp2/3 complex. Binary interaction matrix for the 18-member extended Arp2/3 complex used in the study. A 2-dimensional representation of the matrix is shown in Figure 4A. All edges are based in interaction data with the exception of those for Arp3 are based in data from [1]. Edges for Arp3 are based on protein-protein interaction data from BIOGRID (Las17, Myo5, Arc40) or from the Arp2/3 PDB structure 1K8K (Arp2, Arc35, Arc19, Arc18, Arc15). (XLS) [file pcbi.1003654.s001.xls]

## Sheet: im
	Arc15	Arc18	Arc19	Arc35	Arc40	Arp2	Arp3	Sla1	Sla2	End3	Las17	Rvs167	Rvs161	Gyl1	Sec4	YNR065C	Myo5	Lsb3
Arc15	0	0	0	0	0	1	1	0	1	0	1	0	1	0	0	0	1	0
Arc18	0	0	1	1	1	1	1	0	1	0	1	0	0	0	0	0	1	0
Arc19	0	1	0	1	1	1	1	0	1	0	1	0	0	0	0	0	1	0
Arc35	0	1	1	0	1	1	1	0	1	0	1	1	0	0	0	0	0	0
Arc40	0	1	1	1	0	1	1	1	1	0	1	1	1	0	0	0	1	1
Arp2	1	1	1	1	1	0	1	0	0	0	1	0	0	0	0	0	1	0
Arp3	1	1	1	1	1	1	0	0	0	0	1	0	0	0	0	0	1	0
Sla1	0	0	0	0	1	0	0	0	1	1	1	0	0	0	0	0	0	1
Sla2	1	1	1	1	1	0	0	1	0	1	1	0	0	0	0	0	0	0
End3	0	0	0	0	0	0	0	1	1	0	1	0	0	0	0	0	0	0
Las17	1	1	1	1	1	1	1	1	1	1	0	0	0	0	0	0	1	1
Rvs167	0	0	0	1	1	0	0	0	0	0	0	0	1	0	0	0	0	1
Rvs161	1	0	0	0	1	0	0	0	0	0	0	1	0	1	0	0	0	0
Gyl1	0	0	0	0	0	0	0	0	0	0	0	0	1	0	1	1	0	0
Sec4	0	0	0	0	0	0	0	0	0	0	0	0	0	1	0	0	0	0
YNR065C	0	0	0	0	0	0	0	0	0	0	0	0	0	1	0	0	0	0
Myo5	1	1	1	0	1	1	1	0	0	0	1	0	0	0	0	0	0	0
Lsb3	0	0	0	0	1	0	0	1	0	0	1	1	0	0	0	0	0	0
