# Supplementary material for: Exploration of the Dynamic Properties of Protein Complexes Predicted from Spatially Constrained Protein-Protein Interaction Networks
Source: PLoS Comput Biol. 2014 May 29;10(5):e1003654. doi: 10.1371/journal.pcbi.1003654 (PMC4038459; doi:10.1371/journal.pcbi.1003654)
Supplement: Text S1 — MCMC proof. (PDF) [file pcbi.1003654.s005.pdf]

## Supplemental text S1: MCMC Proof

The observed interaction data,  $\hat{I}$ , defines a posterior distribution over the set of possible conformations of the protein complex:  $P[S|\hat{I}] = P[\hat{I}|S] \cdot P[\hat{I}] / P[S]$ . Since we apply a constant constraint on the state space and the probability of the observed data ( $\hat{I}$ ) is constant with respect to  $S$ , we get  $P[S|\hat{I}] = \kappa \cdot P[\hat{I}|S]$  for some constant  $\kappa$ , and thus we have:

$$P[S|\hat{I}] = \kappa \cdot \left( \prod_{\substack{\text{interacting} \\ i,j}} P[\hat{I}(i,j) | I(i,j) = f(D_s(i,j), k)] \right) \cdot \left( \prod_{\substack{\text{not-interacting} \\ i,j}} P[\hat{I}(i,j) | NI(i,j) = g(D_s(i,j))] \right)$$

where  $f$  and  $g$  are the Weibull and Cumulative Weibull distribution as described in the method.
